# Supplementary material
Source: PubMed Central journal article supplement (PMC9859788)
Supplement: 41396_2022_1339_MOESM1_ESM.pdf [file 41396_2022_1339_MOESM1_ESM.pdf]

## Supplementary information

### Recovery and genome reconstruction of novel magnetotactic *Elusimicrobiota* from bog soil

Maria Uzun<sup>1,2</sup>, Veronika Koziava<sup>1</sup>, Marina Dziuba<sup>1,3</sup>, Lolita Alekseeva<sup>1</sup>, Maria Krutkina<sup>5</sup>, Marina Sukhacheva<sup>1</sup>, Roman Baslerov<sup>1</sup>, Denis Grouzdev<sup>4,5</sup>

<sup>1</sup>Skryabin Institute of Bioengineering Research Center of Biotechnology of the Russian Academy of Sciences, Moscow, Russia

<sup>2</sup> Faculty of Biology, Lomonosov Moscow State University, Moscow, Russia

<sup>3</sup> Department of Microbiology, University of Bayreuth, Bayreuth, Germany

<sup>4</sup> SciBear OU, Tallinn, Estonia

<sup>5</sup> School of Marine and Atmospheric Sciences, Stony Brook University, Stony Brook, USA

#corresponding author: denisgrouzdev@gmail.com

#### Content:

**Supplementary Figure S1.** Hierarchical clustering analysis (HCA) of *Elusimicrobiota* genomes based on the completeness (estimated using DRAM) carbon and energy metabolism pathways. Scale bar indicates the pathway completeness. The MTB genomes are highlighted in red.....2

**Supplementary Figure S2.** Hierarchical clustering analysis (HCA) of *Elusimicrobiota* genomes based on the abundance of chemotaxis and motility-related genes. Scale bar indicates the standardized number of genes. The MTB genomes are highlighted in red.....3

**Supplementary Table S1.** Results of the physical and chemical parameters of the analyzed microcosm.....4

**Supplementary Table S2.** Results of 16S rRNA sequencing and alpha-diversity statistics for soil microcosm, filtrate, and magnetic enrichment fraction.....4

**Supplementary Table S3.** Statistics for the top 25 zOTUs and results of their NCBI BLAST analyses with MTB and non-MTB.....5

**Supplementary Table S4.** Statistics of genomes reconstructed in this study. ....7

**Supplementary Tables S5-S13** can be found as separate file (Supplementary Tables S5-S13.xlsx)

**Supplementary Table S5.** Accompanying information about *Elusimicrobiota* genomes, studied in this work

**Supplementary Table S6.** AAI values between *Elusimicrobiota* genomes

**Supplementary Table S7.** Results of DRAM analysis of *Elusimicrobiota* genomes studied in this work.

**Supplementary Table S8.** Results of predicting organic nitrogen metabolism based on *Elusimicrobiota* genomic data

**Supplementary Table S9.** Results of predicting energy metabolism based on *Elusimicrobiota* genomic data

**Supplementary Table S10.** Results of predicting transporter proteins based on *Elusimicrobiota* genomic data

**Supplementary Table S11.** Results of predicting carbon utilization metabolism based on *Elusimicrobiota* genomic data

**Supplementary Table S12.** Results of detected motility genes based on *Elusimicrobiota* genomic data

**Supplementary Table S13.** *Elusimicrobiota* MGC genes and their conserved domains

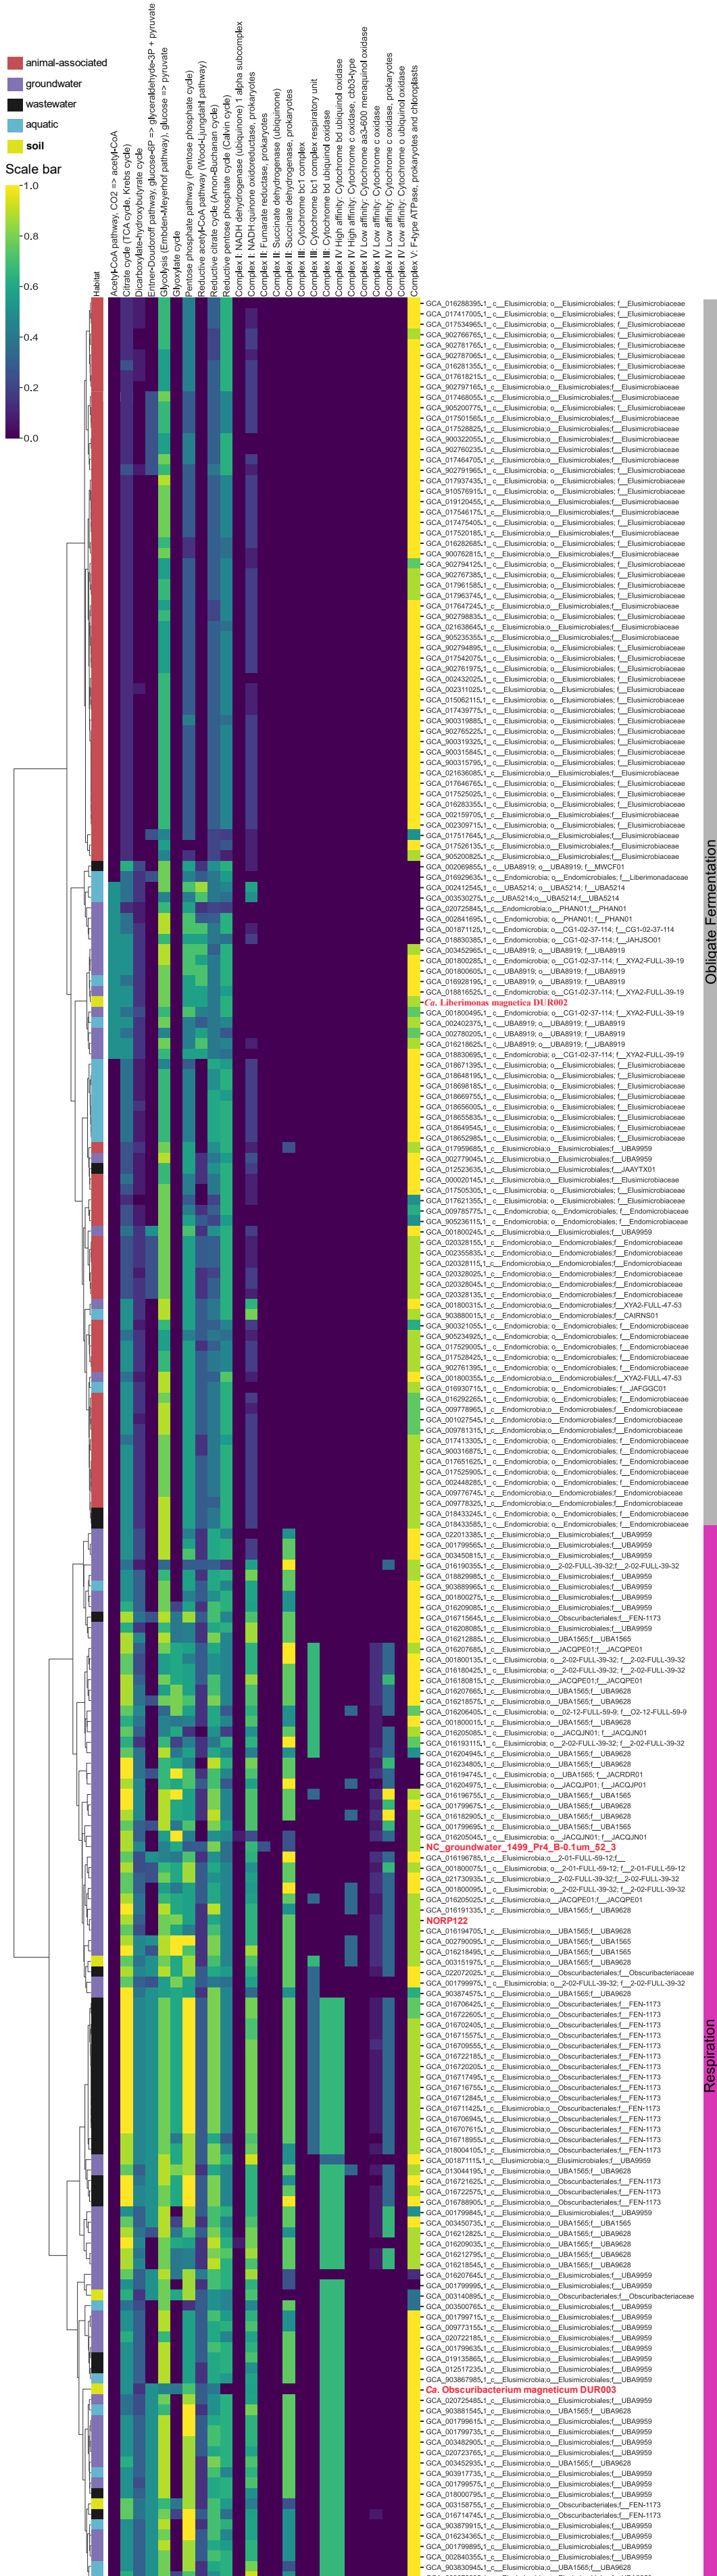

**Supplementary Figure S1.** Hierarchical clustering analysis (HCA) of *Elusimicrobiota* genomes based on the completeness (estimated using DRAM) carbon and energy metabolism pathways. Scale bar indicates the pathway completeness. The MTB genomes are highlighted in red.

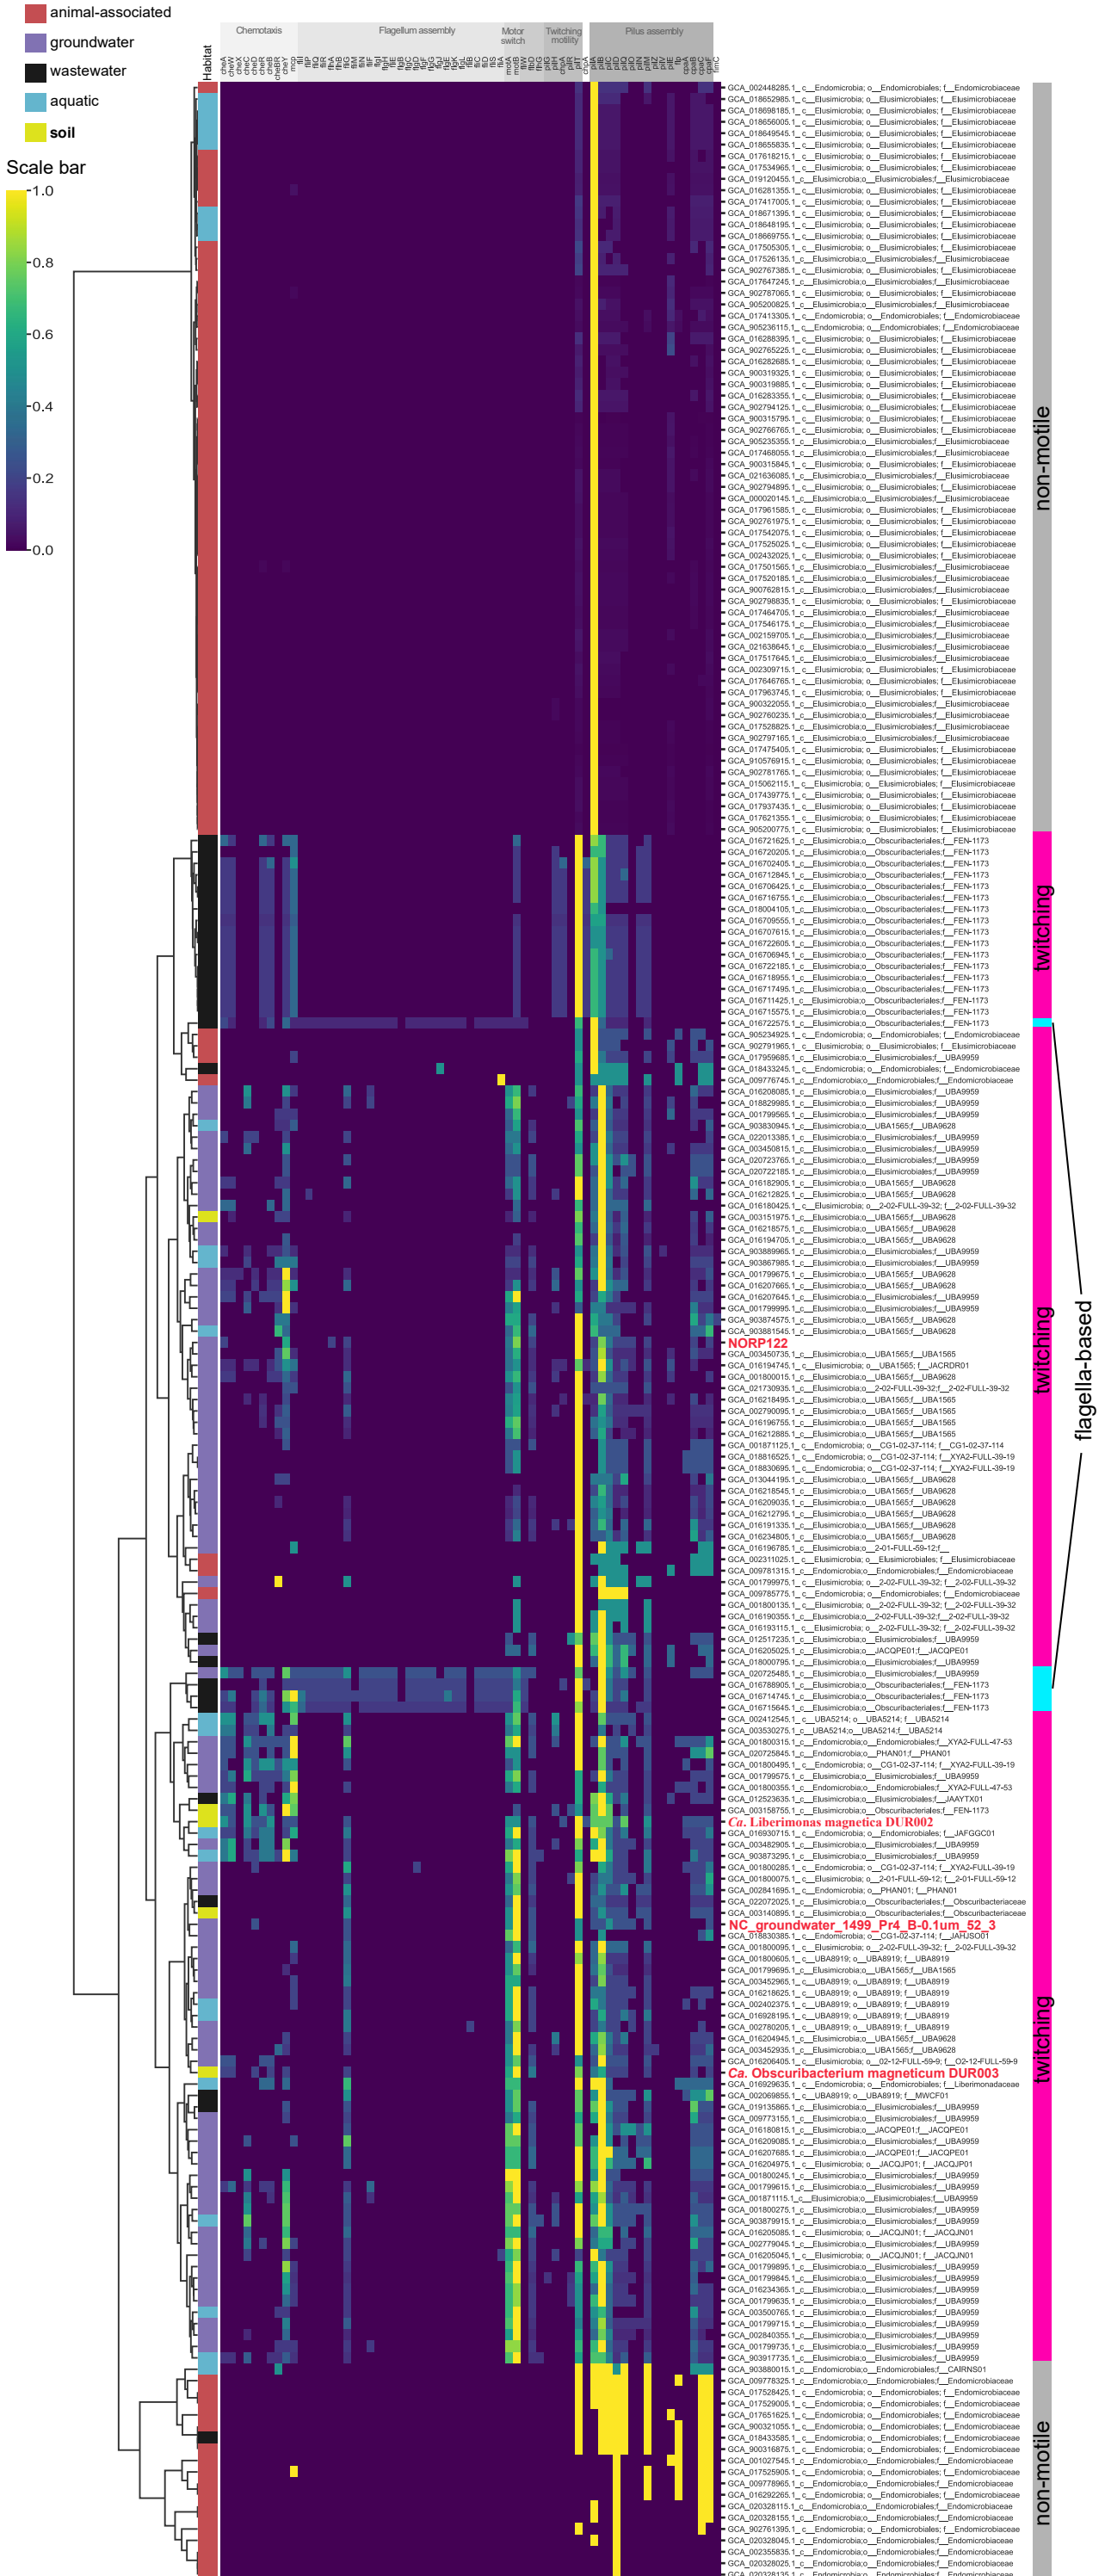

**Supplementary Figure S2.** Hierarchical clustering analysis (HCA) of *Elusimicrobiota* genomes based on the abundance of chemotaxis and motility-related genes. Scale bar indicates the standardized number of genes. The MTB genomes are highlighted in red.

**Supplementary Table S1.** Results of the physical and chemical parameters of the analyzed microcosm.

| <b>№</b>  | <b>Measurement, unit of measurement</b>            | <b>Result</b>   | <b>№</b>  | <b>Measurement, unit of measurement</b> | <b>Result</b>   |
|-----------|----------------------------------------------------|-----------------|-----------|-----------------------------------------|-----------------|
| <b>1</b>  | Conductivity, uS/cm                                | 35.0 ± 3.4      | <b>20</b> | Li, mg/dm <sup>3</sup>                  | < 0.01          |
| <b>2</b>  | pH                                                 | 8.5             | <b>21</b> | Mg, mg/dm <sup>3</sup>                  | 10.7 ± 1.6      |
| <b>3</b>  | NO <sub>3</sub> <sup>-</sup> , mg/dm <sup>3</sup>  | < 0.1           | <b>22</b> | Mn, mg/dm <sup>3</sup>                  | 0.021 ± 0.006   |
| <b>4</b>  | NO <sub>2</sub> <sup>-</sup> , mg/dm <sup>3</sup>  | < 0.1           | <b>23</b> | Cu, mg/dm <sup>3</sup>                  | 0.0036 ± 0.0014 |
| <b>5</b>  | SO <sub>4</sub> <sup>2-</sup> , mg/dm <sup>3</sup> | 20.7 ± 2.7      | <b>24</b> | Mo, mg/dm <sup>3</sup>                  | < 0.001         |
| <b>6</b>  | PO <sub>4</sub> <sup>2-</sup> , mg/dm <sup>3</sup> | < 0.1           | <b>25</b> | As, mg/dm <sup>3</sup>                  | < 0.005         |
| <b>7</b>  | F <sup>-</sup> , mg/dm <sup>3</sup>                | 0.17 ± 0.02     | <b>26</b> | Na, mg/dm <sup>3</sup>                  | 3.9 ± 0.6       |
| <b>8</b>  | Cl <sup>-</sup> , mg/dm <sup>3</sup>               | 5.75 ± 0.75     | <b>27</b> | Ni, mg/dm <sup>3</sup>                  | < 0.001         |
| <b>9</b>  | Al, mg/dm <sup>3</sup>                             | 0.154 ± 0.039   | <b>28</b> | Pb, mg/dm <sup>3</sup>                  | < 0.003         |
| <b>10</b> | Ba, mg/dm <sup>3</sup>                             | 0.052 ± 0.010   | <b>29</b> | Se, mg/dm <sup>3</sup>                  | < 0.005         |
| <b>11</b> | Be, mg/dm <sup>3</sup>                             | < 0.00010       | <b>30</b> | S, mg/dm <sup>3</sup>                   | 6 ± 1.1         |
| <b>12</b> | B, mg/dm <sup>3</sup>                              | < 0.01          | <b>31</b> | Ag, mg/dm <sup>3</sup>                  | < 0.005         |
| <b>13</b> | V, mg/dm <sup>3</sup>                              | 0.0046 ± 0.0012 | <b>32</b> | Sr, mg/dm <sup>3</sup>                  | 0.169 ± 0.034   |
| <b>14</b> | Fe, mg/dm <sup>3</sup>                             | 0.5 ± 0.08      | <b>33</b> | Sb, mg/dm <sup>3</sup>                  | < 0.005         |
| <b>15</b> | Cd, mg/dm <sup>3</sup>                             | < 0.0001        | <b>34</b> | Ti, mg/dm <sup>3</sup>                  | 0.0060 ± 0.0024 |
| <b>16</b> | K, mg/dm <sup>3</sup>                              | 1.6 ± 0.24      | <b>35</b> | P, mg/dm <sup>3</sup>                   | 0.2 ± 0.07      |
| <b>17</b> | Ca, mg/dm <sup>3</sup>                             | 82 ± 12         | <b>36</b> | Cr, mg/dm <sup>3</sup>                  | < 0.001         |
| <b>18</b> | Co, mg/dm <sup>3</sup>                             | < 0.001         | <b>37</b> | Zn, mg/dm <sup>3</sup>                  | < 0.005         |
| <b>19</b> | Si, mg/dm <sup>3</sup>                             | 14.5 ± 2.2      | <b>38</b> | H <sub>2</sub> S, mg/dm <sup>3</sup>    | 115.2           |

**Supplementary Table S2.** Results of 16S rRNA sequencing and alpha-diversity statistics for soil microcosm, filtrate, and magnetic enrichment fraction.

| <b>Sample</b>    | <b>reads</b> | <b>zOTUs</b> | <b>chao1</b> | <b>equitability</b> | <b>jost</b> | <b>simpson</b> | <b>shannon</b> |
|------------------|--------------|--------------|--------------|---------------------|-------------|----------------|----------------|
| <b>S (rep_1)</b> | 45276        | 3342         | 3342.2       | 0.846               | 525.3       | 0.0030         | 9.91           |
| <b>S (rep_2)</b> | 43474        | 3205         | 3205.3       | 0.852               | 540.2       | 0.0029         | 9.92           |
| <b>S (rep_3)</b> | 46900        | 3399         | 3399.3       | 0.852               | 557.2       | 0.0029         | 10.00          |
| <b>F</b>         | 46017        | 2723         | 2723.2       | 0.834               | 380.7       | 0.0043         | 9.51           |
| <b>M</b>         | 52399        | 1273         | 1273.7       | 0.668               | 63.1        | 0.0217         | 6.89           |

**Supplementary Table S3.** Statistics for the top 25 zOTUs and results of their NCBI BLAST analyses with MTB and non-MTB

| OTU ID | OTU relative abundance (%) |              |                       | 16s rRNA gene copy numbers |              |                       | nM/nF (%) | Magnetic column response | Top-hit 16S rRNA sequence, including uncultured/environmental sample (NCBI acc. #), similarity | Top-hit 16S rRNA sequence, excluding uncultured/environmental sample (NCBI acc. #), similarity | Top-hit 16S rRNA sequence of validly described bacteria (NCBI acc. #), similarity | Top-hit 16S rRNA sequence of MTB (NCBI acc. #), similarity            | Phylum                         |
|--------|----------------------------|--------------|-----------------------|----------------------------|--------------|-----------------------|-----------|--------------------------|------------------------------------------------------------------------------------------------|------------------------------------------------------------------------------------------------|-----------------------------------------------------------------------------------|-----------------------------------------------------------------------|--------------------------------|
|        | Soil (S)                   | Filtrate (F) | Magnetic fraction (M) | Soil(S)                    | Filtrate (F) | Magnetic fraction (M) |           |                          |                                                                                                |                                                                                                |                                                                                   |                                                                       |                                |
| DUR001 | 0.001                      | 0.041        | 3.158                 | 1.01E+03                   | 3.09E+03     | 2.09E+03              | 68.9      | TRUE                     | Uncultured bacterium BB-B20 (GQ844331), 84.2%                                                  | <i>Syntrophorhabdus</i> sp. TB (AB611035), 84.2%                                               | <i>Vicinamibacter silvestris</i> Ac_5_C6 (KP761690), 80.0%                        | Nitrospinae bacterium nWMHbin6 (JADGCD010000264), 80.6%               | Unclassified Bacteria          |
| DUR002 | 0.002                      | 0.035        | 1.709                 | 2.02E+03                   | 2.64E+03     | 1.13E+03              | 44.3      | TRUE                     | Uncultured bacterium ELA_111314_OTU_1260 (KY516811), 97.5%                                     | Elusimicrobia bacterium RIFOXYB12_FULL_50_12 (MGVK01000024), 91.9%                             | <i>Endomicrobium proavitum</i> Rsa215 (CP009498), 88.7%                           | Elusimicrobia bacterium NORP122 (NVTF01000082), 79.2%                 | <i>Elusimicrobiota</i>         |
| DUR003 | 0.009                      | 0.102        | 2.446                 | 9.08E+03                   | 7.68E+03     | 1.62E+03              | 21.6      | TRUE                     | Uncultured bacterium TE1b515h12_7891 (JQ369221), 92.6%                                         | Elusimicrobia bacterium Bin_99 (JAJVIP010000006), 88.1%                                        | <i>Endomicrobium proavitum</i> Rsa215 (CP009498), 85.1%                           | Elusimicrobia bacterium NORP122 (NVTF01000082), 80.0%                 | <i>Elusimicrobiota</i>         |
| DUR004 | 0.016                      | 0.087        | 5.880                 | 1.61E+04                   | 6.55E+03     | 3.90E+03              | 61.0      | TRUE                     | Uncultured bacterium HDB_SIST624 (HM187352), 96.5%                                             | <i>Ca. Velamenicoccus</i> archaeovorans LiM (CP019384), 86.1%                                  | <i>Desulforegula conservatrix</i> Mb1Pa (AUEY01000125), 81.1%                     | <i>Ca. Omnitrphica</i> bacterium nDJH13bin20 (JADFXH010000013), 83.9% | <i>Ca. Omnitrphota</i>         |
| DUR005 | 0.012                      | 0.039        | 4.288                 | 1.21E+04                   | 2.94E+03     | 2.84E+03              | 98.8      | TRUE                     | Uncultured bacterium OTU2881 (MF452574), 98.2%                                                 | <i>Geobacter</i> sp. SVR (AP024469), 89.1%                                                     | <i>Geobacter hydrogenophilus</i> H2 (U28173), 88.5%                               | <i>Ca. Belliniella magnetica</i> LBB04 (MK632188), 85.4%              | <i>Thermodesulfobacteriota</i> |
| DUR006 | 0.032                      | 0.104        | 5.926                 | 3.23E+04                   | 7.83E+03     | 3.93E+03              | 51.2      | TRUE                     | Uncultured proteobacterium TRF-215 (JX859941), 99.4%                                           | <i>Syntrophus aciditrophicus</i> SB (CP000252), 93.8%                                          | <i>Syntrophus aciditrophicus</i> SB (CP000252), 93.8%                             | <i>Ca. Belliniella magnetica</i> LBB04 (MK632188), 97.2%              | <i>Thermodesulfobacteriota</i> |
| DUR007 | 0.154                      | 2.858        | 0.073                 | 1.55E+05                   | 2.15E+05     | 4.84E+01              | 0.0       | FALSE                    | Uncultured bacterium CSBC1F02 (GU127054), 90.9%                                                | <i>Ignavibacterium album</i> JCM 16511 (CP003418), 85.5%                                       | <i>Ignavibacterium album</i> JCM 16511 (CP003418), 85.5%                          | <i>Ca. Magnetomorum</i> sp. HK-1 (JPDT01000165), 79.3%                | Unclassified Bacteria          |
| DUR008 | 0.042                      | 0.180        | 3.711                 | 4.24E+04                   | 1.36E+04     | 2.46E+03              | 18.5      | TRUE                     | Uncultured organism SBZO_2108 (JN530671), 94.0%                                                | <i>Ca. Sumerlaea chitinivorans</i> BY40 (CP030759), 81.7%                                      | <i>Halothermothrix orenii</i> H 168 (NR_074915), 81.1%                            | Nitrospinae bacterium nWMHbin6 (JADGCD010000264), 79.2%               | Unclassified Bacteria          |
| DUR009 | 0.002                      | 0.026        | 4.441                 | 2.02E+03                   | 1.96E+03     | 2.94E+03              | 153.5     | TRUE                     | Uncultured bacterium pinkB.2010_8-clones-1 (KF513106), 91.9%                                   | <i>Desulfatiglans parachlorophenolica</i> DS (AB763347), 87.5%                                 | <i>Desulfatiglans parachlorophenolica</i> DS (AB763347), 87.5%                    | <i>Ca. Belliniella magnetica</i> LBB04 (MK632188), 84.1%              | <i>Thermodesulfobacteriota</i> |
| DUR010 | 1.737                      | 0.435        | 0.073                 | 1.75E+06                   | 3.27E+04     | 4.84E+01              | 0.2       | FALSE                    | Uncultured bacterium AN040 (GQ860021), 98.7%                                                   | Bacterium SCGC AAA018-P21 (HQ290515), 95.3%                                                    | <i>Azoarcus olearius</i> DQS-4 (EF158388), 92.5%                                  | <i>Desulfamplus</i> sp. nJC1bin9 (JADFZQ010000075), 84.3%             | <i>Pseudomonadota</i>          |
| DUR011 | 0.508                      | 0.524        | 1.111                 | 5.13E+05                   | 3.95E+04     | 7.37E+02              | 1.9       | FALSE                    | <i>Methyloversatilis</i> sp. LF (MK795691), 99.6%                                              | <i>Methyloversatilis</i> sp. LF (MK795691), 99.6%                                              | <i>Methyloversatilis discipulorum</i> FAM1 (AZUP01000001), 99.4%                  | <i>Desulfamplus</i> sp. nJC1bin9 (JADFZQ010000075), 85.1%             | <i>Pseudomonadota</i>          |
| DUR012 | 0.988                      | 0.080        | 0.021                 | 9.97E+05                   | 6.02E+03     | 1.39E+01              | 0.2       | FALSE                    | Uncultured bacterium A6B8 (LN715716), 99.1%                                                    | <i>Ca. Electronema nielsenii</i> Freshwater_Gib-F5 (KP728465), 87.9%                           | <i>Simulacricoccus ruber</i> MCy10636 (MH094235), 87.3%                           | Deltaproteobacteria bacterium YD0425bin50 (PDZT01000031), 83.2%       | <i>Thermodesulfobacteriota</i> |

| OTU ID | OTU relative abundance (%) |              |                       | 16s rRNA gene copy numbers |              |                       | nM/nF (%) | Magnetic column response | Top-hit 16S rRNA sequence, including uncultured/environmental sample (NCBI acc. #), similarity | Top-hit 16S rRNA sequence, excluding uncultured/environmental sample (NCBI acc. #), similarity | Top-hit 16S rRNA sequence of validly described bacteria (NCBI acc. #), similarity | Top-hit 16S rRNA sequence of MTB (NCBI acc. #), similarity                   | Phylum                         |
|--------|----------------------------|--------------|-----------------------|----------------------------|--------------|-----------------------|-----------|--------------------------|------------------------------------------------------------------------------------------------|------------------------------------------------------------------------------------------------|-----------------------------------------------------------------------------------|------------------------------------------------------------------------------|--------------------------------|
|        | Soil (S)                   | Filtrate (F) | Magnetic fraction (M) | Soil(S)                    | Filtrate (F) | Magnetic fraction (M) |           |                          |                                                                                                |                                                                                                |                                                                                   |                                                                              |                                |
| DUR013 | 0.000                      | 0.020        | 2.174                 | 0.00E+00                   | 1.51E+03     | 1.44E+03              | 100.2     | TRUE                     | Uncultured bacterium ELA_111314_OTU_6783 (KY521808), 100.0%                                    | <i>Calorithrix insularis</i> KR (KX225427), 82.0%                                              | <i>Calorithrix insularis</i> KR (KX225427), 82.0%                                 | <i>Ca. Belliniella magnetica</i> LBB04 (MK632188), 79.8%                     | Unclassified Bacteria          |
| DUR014 | 0.007                      | 0.083        | 3.664                 | 7.06E+03                   | 6.25E+03     | 2.43E+03              | 40.0      | TRUE                     | Uncultured bacterium SS_LKC22_UB80 (AM490670), 98.1%                                           | Planctomycetaceae bacterium ECT2AJA-110-A (CP030884), 83.7%                                    | <i>Brevitalea deliciosa</i> Ac_16_C4 (NR_151988), 78.5%                           | Planctomycetes bacterium isolate MAG_18080_pl_157 (DUZQ01000079), 73.7%      | <i>Planctomycetotota</i>       |
| DUR015 | 0.678                      | 0.011        | 0.008                 | 6.84E+05                   | 8.28E+02     | 5.30E+00              | 0.6       | FALSE                    | Uncultured bacterium HDB_SIPC470 (HM186890), 98.5%                                             | <i>Syntrophorhabdus aromaticivorans</i> UI (KI867150), 82.2%                                   | <i>Syntrophorhabdus aromaticivorans</i> UI (KI867150), 82.2%                      | Nitrospirae bacterium nWMHbin6 (JADGCD010000264), 81.9%                      | Unclassified Bacteria          |
| DUR016 | 2.075                      | 0.815        | 0.097                 | 2.09E+06                   | 6.14E+04     | 6.43E+01              | 0.1       | FALSE                    | Uncultured bacterium JRB4-Oct14 (MH934558), 99.1%                                              | Proteobacteria bacterium IMCC26096 (MW884648), 94.9%                                           | <i>Nitrosospira tenuis</i> Nv1 (FOBH01000006), 91.6%                              | <i>Desulfamplus</i> sp. nJC1bin9 (JADFZQ010000075), 87.2%                    | <i>Pseudomonadota</i>          |
| DUR017 | 0.005                      | 0.093        | 1.525                 | 5.05E+03                   | 7.00E+03     | 1.01E+03              | 14.7      | TRUE                     | Uncultured bacterium 1338 (KY691750), 97.6%                                                    | Bacterium YC-ZSS-LKJ31 (KP174519), 81.4%                                                       | <i>Halochromatium roseum</i> JA134 (AM283535), 80.7%                              | Nitrospirae bacterium MYbin3 (PEAD01000007), 79.6%                           | Unclassified Bacteria          |
| DUR018 | 0.115                      | 0.674        | 2.060                 | 1.16E+05                   | 5.07E+04     | 1.37E+03              | 2.8       | FALSE                    | Uncultured bacterium GrasBac037 (KC161712), 98.9%                                              | Syntrophaceae bacterium JGI 0000059-J07 (KJ638710), 93.8%                                      | <i>Smithella propionica</i> R4b16 (AF482441), 92.5%                               | <i>Ca. Belliniella magnetica</i> LBB04 (MK632188), 93.9%                     | <i>Thermodesulfobacteriota</i> |
| DUR019 | 0.094                      | 0.080        | 3.982                 | 9.49E+04                   | 6.02E+03     | 2.64E+03              | 44.6      | TRUE                     | Uncultured bacterium BSN022 (AB364726), 98.9%                                                  | Syntrophaceae bacterium JGI 0000059-J07 (KJ638710), 90.0%                                      | <i>Syntrophus aciditrophicus</i> SB (CP000252), 89.3%                             | <i>Ca. Belliniella magnetica</i> LBB04 (MK632188), 88.6%                     | <i>Thermodesulfobacteriota</i> |
| DUR020 | 0.535                      | 0.091        | 0.006                 | 5.40E+05                   | 6.85E+03     | 3.98E+00              | 0.1       | FALSE                    | Uncultured bacterium FL0428B_PF12needseq (FJ716468), 98.6%                                     | <i>Ca. Magnetobacterium bavaricum</i> TM-1 (LACI01000304), 89.8%                               | <i>Thermoclostridium caenicola</i> EBR596 (AB221372), 83.6%                       | <i>Ca. Magnetobacterium bavaricum</i> TM-1 (LACI01000304), 89.8%             | <i>Nitrospirota</i>            |
| DUR021 | 0.009                      | 0.022        | 1.961                 | 9.08E+03                   | 1.66E+03     | 1.30E+03              | 81.3      | TRUE                     | Uncultured NKB19 bacterium QEDV3AH03 (CU920011), 97.4%                                         | <i>Ca. Hydrogenedentes</i> bacterium MJ-time_bin-1056 (CAIYET010000682), 96.7%                 | <i>Wenzhouxiangella marina</i> KCTC 42284 (CP012154), 84.2%                       | <i>Ca. Hydrogenedentes</i> bacterium MAG_17971_hgd_130 (DUZN01000164), 92.3% | <i>Hydrogenedentota</i>        |
| DUR022 | 1.775                      | 0.274        | 0.023                 | 1.79E+06                   | 2.06E+04     | 1.53E+01              | 0.1       | FALSE                    | Uncultured bacterium AN231 (GQ859848), 99.1%                                                   | <i>Geobacter</i> sp. RPFA-12G-4 (LC379581), 89.5%                                              | <i>Geobacter soli</i> GSS01 (JXBL01000001), 88.8%                                 | <i>Ca. Belliniella magnetica</i> LBB04 (MK632188), 87.3%                     | <i>Thermodesulfobacteriota</i> |
| DUR023 | 0.341                      | 0.356        | 0.042                 | 3.44E+05                   | 2.68E+04     | 2.79E+01              | 0.1       | FALSE                    | Uncultured bacterium 450cmOC0043 (KC922900), 99.1%                                             | <i>Povalibacter uvarum</i> Zumi 37 (AB548216), 88.8%                                           | <i>Povalibacter uvarum</i> Zumi 37 (AB548216), 88.8%                              | Magnetococcales bacterium WMHbin3 (PDZX01000011), 81.6%                      | <i>Pseudomonadota</i>          |
| DUR024 | 0.182                      | 2.726        | 0.053                 | 1.84E+05                   | 2.05E+05     | 3.51E+01              | 0.0       | FALSE                    | Uncultured bacterium B0618R001_D14 (AB658268), 98.7%                                           | <i>Ignavibacterium album</i> JCM 16511 (CP003418), 85.8%                                       | <i>Ignavibacterium album</i> JCM 16511 (CP003418), 85.8%                          | <i>Ca. Magnetomicrobium cryptolimnococcus</i> XYZ (JAGYWI010000050), 78.8%   | Unclassified Bacteria          |
| DUR025 | 0.351                      | 0.320        | 0.107                 | 3.54E+05                   | 2.41E+04     | 7.10E+01              | 0.3       | FALSE                    | Uncultured bacterium clone 4_mid (MF942713), 99.8%                                             | Proteobacteria bacterium IMCC26096 (MW884648), 99.1%                                           | <i>Nitrosospira tenuis</i> Nv1 (FOBH01000006), 93.8%                              | <i>Desulfamplus</i> sp. nJC1bin9 (JADFZQ010000075), 88.8%                    | <i>Pseudomonadota</i>          |

**Supplementary Table S4.** Statistics of genomes reconstructed in this study.

| Parameter                      | DUR002                          | DUR003                          |
|--------------------------------|---------------------------------|---------------------------------|
| GenBank assembly accession no. | <a href="#">JAJAPY000000000</a> | <a href="#">JAJAPZ000000000</a> |
| Completeness (%)               | 94.38                           | 75.84                           |
| Contamination (%)              | 0                               | 3.37                            |
| GTDB classification            |                                 |                                 |
| Phylum                         | <i>Elusimicrobiota</i>          | <i>Elusimicrobiota</i>          |
| Class                          | <i>Endomicrobia</i>             | <i>Elusimicrobia</i>            |
| Order                          | <i>Endomicrobiales</i>          | F11                             |
| Family                         | -                               | F11                             |
| Genus                          | -                               | FEN-1177                        |
| Species                        | -                               | -                               |
| No. of scaffolds               | 29                              | 137                             |
| Assembly N <sub>50</sub> (bp)  | 185704                          | 46489                           |
| Genome coverage (×)            | 218.6x                          | 79.5x                           |
| Assembly size (bp)             | 3394123                         | 2891406                         |
| GC content (%)                 | 39.76                           | 52.84                           |
| No. of genes                   | 2714                            | 2426                            |
| No. of rRNA genes              | 3                               | 3                               |
| 5S rRNA                        | 1                               | 1                               |
| 16S rRNA                       | 1                               | 1                               |
| 23S rRNA                       | 1                               | 1                               |
| No. of tRNA genes              | 45                              | 49                              |
| MAG quality                    | High-quality                    | Medium-quality                  |
